# Supplementary material
Source: PubMed Central journal article supplement (PMC6731352)
Supplement: mmc1.pdf [file mmc1.pdf]

## Supplemental Data

### **Mutations in *ANAPC1*, Encoding a Scaffold Subunit of the Anaphase-Promoting Complex, Cause Rothmund-Thomson Syndrome Type 1**

Norbert F. Ajeawung, Thi Tuyet Mai Nguyen, Linchao Lu, Thomas J. Kucharski, Justine Rousseau, Sirinart Molidperee, Joshua Atienza, Isabel Gamache, Weidong Jin, Sharon E. Plon, Brendan H. Lee, Jose G. Teodoro, Lisa L. Wang, and Philippe M. Campeau

A

Individual 7a

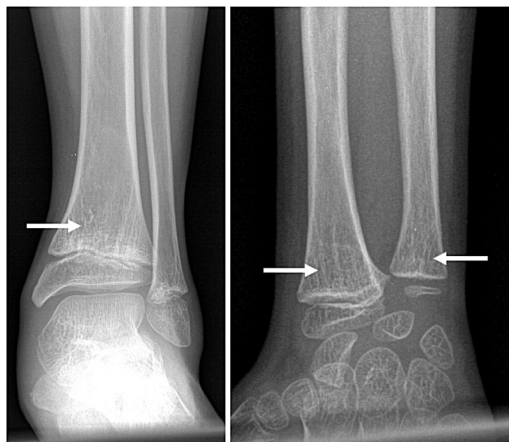

B

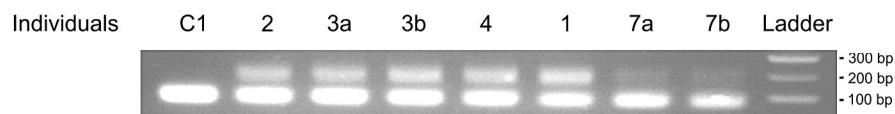

C

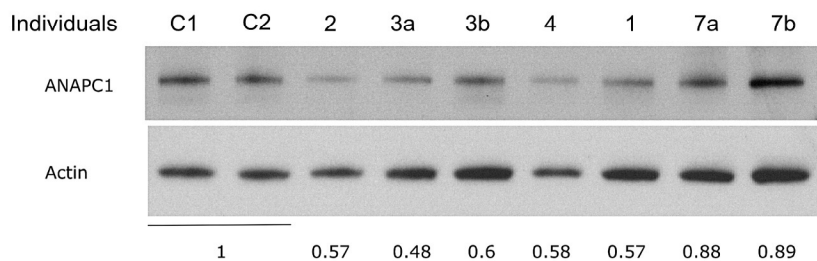

D

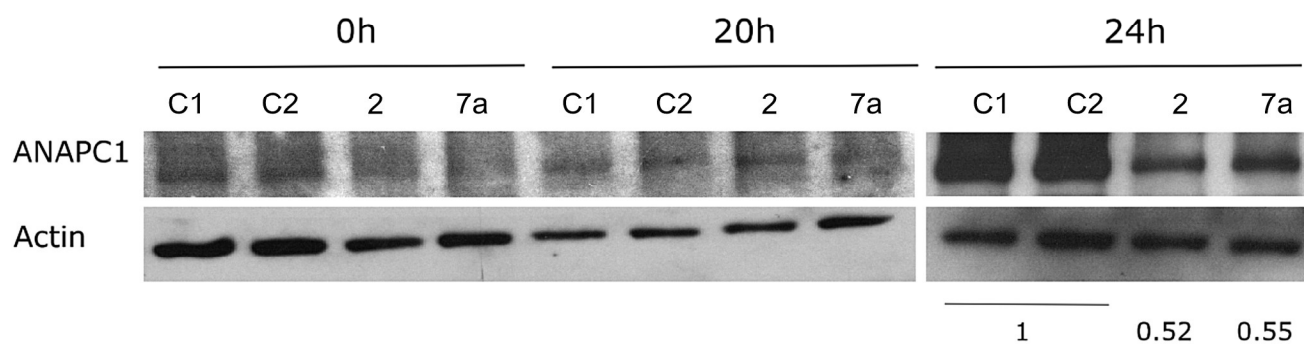

E

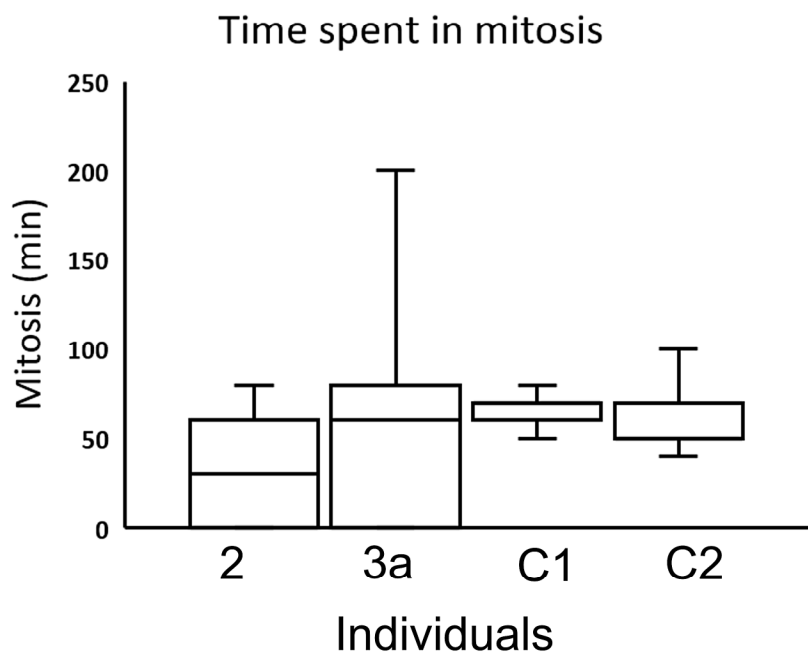

Figure S1

Figure S1. Radiographs and *ANAPC1* expression studies.

A) Radiographs of individual 7a at 9 years of age show abnormal sclerotic marks near the metaphyses of the ankle (left) and wrist (right).

B) *ANAPC1* expression in RTS Type 1 available fibroblasts by qPCR. For all five homozygous individuals (2, 3a, 3b, 4, and 1) there was presence of a clear upper band corresponding to the increased size of the fragment because of the retained pseudo-exon. The upper band was also seen in both individuals with compound heterozygous mutations (7a, 7b) but with less intensity than in the other affected individuals. C1 = wildtype control

C) Western blot of *ANAPC1* for the same affected individuals. Relative expression was calculated by normalizing to Actin and comparing with the *ANAPC1* levels in control cells (C1, C2) using Quantity One software, version 4.6.6 (Biorad). In all five individuals homozygous for the *ANAPC1* intronic splicing variant, *ANAPC1* was decreased by half while individuals with compound heterozygous mutations showed a moderate reduction.

D) *ANAPC1* expression in synchronized fibroblasts. Fibroblasts from two healthy controls (C1, C2), individual 2 (homozygous for the intronic splicing mutation) and 7a (compound heterozygous mutations) were plated 1 day before serum starvation for 24h. Then the cells were supplemented again with 20% FBS and harvested after 0h, 20h, and 24h. Western blot was performed at the indicated time points. *ANAPC1* expression in the two individuals was calculated as described in C. At 0h and 20h, *ANAPC1* levels were very low, and no difference was detected between controls and individuals. After 24h, *ANAPC1* was abundantly expressed, and a difference is marked at the 24h time point.

E) Same experiment as Figure 3a, but here showing the time spent in mitosis. There was no significant difference between any group.

Table S1. Additional clinical details.

|                       |                              | Individuals homozygous for the intron 22 mutation |   |    |    |                | Individuals compound heterozygous for the intron 22 mutation and another mutation |                            |                   |                                |                                                        | Individuals without <i>ANAPC1</i> mutations |                                |          |
|-----------------------|------------------------------|---------------------------------------------------|---|----|----|----------------|-----------------------------------------------------------------------------------|----------------------------|-------------------|--------------------------------|--------------------------------------------------------|---------------------------------------------|--------------------------------|----------|
| ID in this manuscript |                              | 1                                                 | 2 | 3a | 3b | 4              | 5                                                                                 | 6a                         | 6b                | 7a                             | 7b                                                     | 8a                                          | 8b                             | 9        |
| Eyes                  | Bilateral juvenile cataracts | +                                                 | + | +  | +  | +              | +                                                                                 | +                          | +                 | +                              | +                                                      | No                                          | No                             | No       |
|                       | Other eye findings           | corneal ulcer and retinal detachment              |   |    |    |                | astigmatism                                                                       | microphthalmia, strabismus | strabismus        |                                | lens detachment, photodysphoria, filamentary keratitis |                                             |                                |          |
| Ectoderm              | Poikiloderma                 | +                                                 | + | +  | +  | +              | +                                                                                 | +                          | +                 | +                              | +                                                      | +                                           | +                              | +        |
|                       | Hyperkeratosis               |                                                   | + | +  |    |                |                                                                                   |                            |                   | +                              | +                                                      |                                             |                                |          |
|                       | Blistering                   |                                                   |   |    |    |                | +                                                                                 | +                          |                   | +                              | +                                                      |                                             |                                |          |
|                       | Café-au-lait spots           | +                                                 |   |    |    |                |                                                                                   |                            |                   | +                              | +                                                      |                                             |                                |          |
|                       | Other skin findings          | Eczema                                            |   |    |    |                | photosensitivity                                                                  |                            |                   |                                | warts                                                  |                                             | Squamous cell carcinoma of lip | erythema |
|                       | Sparse hair or alopecia      |                                                   | + |    |    | +              | +                                                                                 | +                          | +                 | +                              | +                                                      | alopecia                                    | alopecia                       |          |
|                       | Absent eyebrows              |                                                   | + | +  | +  | +              | +                                                                                 |                            |                   | +                              | +                                                      | +                                           | +                              |          |
|                       | Absent eyelashes             |                                                   |   | +  | +  | +              |                                                                                   |                            |                   | +                              | +                                                      | +                                           | +                              |          |
|                       | Teeth                        |                                                   |   |    |    | abnormal teeth |                                                                                   | cone shaped teeth          | cone shaped teeth | small pointy teeth with caries | small misshaped teeth with caries                      |                                             |                                |          |
|                       | Nails                        |                                                   |   |    |    |                |                                                                                   | dystrophic nails           | dystrophic nails  | thin nails                     | thin nails                                             |                                             |                                |          |

| Other systems | Endocrine and fertility   |                                  | PO F | 3 children | PO F |   | hypogonadism                          | hypothyroidism                                                                                                                    | hypothyroidism                                    |                                                                                      |                                   |   |   |                                                                                                                                               |
|---------------|---------------------------|----------------------------------|------|------------|------|---|---------------------------------------|-----------------------------------------------------------------------------------------------------------------------------------|---------------------------------------------------|--------------------------------------------------------------------------------------|-----------------------------------|---|---|-----------------------------------------------------------------------------------------------------------------------------------------------|
|               | Genitourinary system      |                                  |      |            |      |   | undescended testes, micropenis        | undescended testes                                                                                                                | undescended testes                                | undescended testes                                                                   | undescended testes                |   |   |                                                                                                                                               |
|               | Short stature             |                                  | -    | -          | -    | + | +                                     | +                                                                                                                                 | +                                                 | +                                                                                    | +                                 | + | + |                                                                                                                                               |
|               | GH therapy                |                                  |      |            |      |   | +                                     | +                                                                                                                                 | +                                                 | +                                                                                    | +                                 |   |   |                                                                                                                                               |
|               | Skeletal                  | Osteoporosis, left foot fracture |      |            |      |   |                                       | delayed bone age, short metacarpals and phalanges, dysplastic aspect of the phalanges, large metaphyses of long bones, genu varum | delayed bone age, short metacarpals and phalanges | arm fracture (never healed properly), punctate sclerotic foci at multiple metaphyses | right arm fixed flexion deformity |   |   |                                                                                                                                               |
|               | Developmental delay or ID |                                  |      |            |      |   | mild developmental delay              | Intellectual disability                                                                                                           | ADHD                                              |                                                                                      |                                   |   |   |                                                                                                                                               |
|               | Recurrent otitis media    |                                  |      |            |      |   | +                                     |                                                                                                                                   |                                                   | +                                                                                    |                                   |   |   | +                                                                                                                                             |
|               | Other                     |                                  |      |            |      |   | GI disturbance, adenoidal hypertrophy |                                                                                                                                   |                                                   | history of hearing loss but improved after PET placement                             |                                   |   |   | history of GI disturbance, history of recurrent pulmonary issues as a toddler (bronchitis, asthma, pneumonia, sinusitis), bradycardia, benign |

|  |  |  |  |  |  |  |  |  |  |  |  |  |  |                              |
|--|--|--|--|--|--|--|--|--|--|--|--|--|--|------------------------------|
|  |  |  |  |  |  |  |  |  |  |  |  |  |  | peripheral<br>flow<br>murmur |
|--|--|--|--|--|--|--|--|--|--|--|--|--|--|------------------------------|
